# Supplementary material for: Gene Amplification, ABC Transporters and Cytochrome P450s: Unraveling the Molecular Basis of Pyrethroid Resistance in the Dengue Vector, Aedes aegypti
Source: PLoS Negl Trop Dis. 2012 Jun 12;6(6):e1692. doi: 10.1371/journal.pntd.0001692 (PMC3373657; doi:10.1371/journal.pntd.0001692)
Supplement: Table S4 — List of genes differentially expressed in the CUBA-DELTA strain compared to New Orleans. (XLS) [file pntd.0001692.s004.xls]

## Sheet: Table S4 All genes Cuba
ProbeName	SystematicName	Seq. Description (Blast2GO)	regulation	FCAbsolute	Corrected p-value	p-value	#GOs	GOs
CUST_9558_PI424980000	AAEL014673-RA	nadh:ubiquinone dehydrogenase	up	59.6206	0.0077414	0.000508154	2	P:mitochondrial electron transport, NADH to ubiquinone; F:NADH dehydrogenase (ubiquinone) activity
CUST_13555_PI424980000	AAEL009465-RA	replication factor c (activator 1) 5	up	31.1708	0.00916838	0.000736249	6	P:auxin biosynthetic process; P:DNA replication; F:DNA clamp loader activity; F:ATP binding; P:retina development in camera-type eye; C:DNA replication factor C complex
CUST_7339_PI424980000	AAEL010682-RA	armadillo repeat-containing protein 4	up	17.4973	0.00585977	0.000291829	1	F:binding
CUST_1259_PI424980000	AAEL002783-RA	mitochondrial ribosomal protein l37	up	16.8644	0.00433446	0.000136677	4	C:ribosome; F:structural constituent of ribosome; P:translation; C:mitochondrion
CUST_211_PI424980000	AAEL002391-RA	carboxylesterase	up	14.0947	0.00846579	0.000605432	2	P:metabolic process; F:hydrolase activity
CUST_12283_PI424980000	AAEL000017-RA	hypothetical protein AaeL_AAEL000017 [Aedes aegypti]	up	13.3401	0.00803628	0.000560916	0	-
CUST_13850_PI424980000	AAEL008298-RB	hypothetical protein AaeL_AAEL008298 [Aedes aegypti]	up	12.7841	0.00224445	2.79766e-05	0	-
CUST_1381_PI424980000	AAEL001156-RA	signal recognition	up	12.7788	0.00418589	0.000126422	6	C:signal recognition particle, endoplasmic reticulum targeting; F:endoplasmic reticulum signal peptide binding; P:negative regulation of translational elongation; F:7S RNA binding; F:protein binding; P:SRP-dependent cotranslational protein targeting to membrane
CUST_8620_PI424980000	AAEL005602-RA	btb poz domain-containing protein 3	up	7.84925	0.00129262	6.92006e-06	1	F:protein binding
CUST_8329_PI424980000	AAEL001811-RA	zinc finger protein 141	up	7.41916	0.00212204	2.20936e-05	3	F:nucleic acid binding; C:nucleus; F:zinc ion binding
CUST_12306_PI424980000	AAEL011656-RA	ribosomal protein s15	up	7.38886	0.000746909	1.75221e-06	5	F:structural constituent of ribosome; C:lipid particle; F:RNA binding; C:small ribosomal subunit; P:translation
CUST_13360_PI424980000	AAEL001180-RA	hypothetical protein AaeL_AAEL001180 [Aedes aegypti]	up	7.38209	0.00282393	5.07736e-05	0	-
CUST_6223_PI424980000	AAEL000934-RC	clathrin light chain	up	6.05626	0.00928482	0.00075587	6	C:clathrin coat of trans-Golgi network vesicle; F:protein binding; P:vesicle-mediated transport; P:intracellular protein transport; F:structural molecule activity; C:clathrin coat of coated pit
CUST_6225_PI424980000	AAEL000934-RE	clathrin light chain	up	5.96256	0.00418589	0.000126042	6	C:clathrin coat of trans-Golgi network vesicle; F:protein binding; P:vesicle-mediated transport; P:intracellular protein transport; F:structural molecule activity; C:clathrin coat of coated pit
CUST_6222_PI424980000	AAEL000934-RB	clathrin light chain	up	5.69679	0.00434263	0.000137736	6	C:clathrin coat of trans-Golgi network vesicle; F:protein binding; P:vesicle-mediated transport; P:intracellular protein transport; F:structural molecule activity; C:clathrin coat of coated pit
CUST_6221_PI424980000	AAEL000934-RA	clathrin light chain	up	5.21644	0.0091137	0.000729096	6	C:clathrin coat of trans-Golgi network vesicle; F:protein binding; P:vesicle-mediated transport; P:intracellular protein transport; F:structural molecule activity; C:clathrin coat of coated pit
CUST_6224_PI424980000	AAEL000934-RD	clathrin light chain	up	5.07364	0.00470447	0.00016574	6	C:clathrin coat of trans-Golgi network vesicle; F:protein binding; P:vesicle-mediated transport; P:intracellular protein transport; F:structural molecule activity; C:clathrin coat of coated pit
CUST_2928_PI424980000	AAEL006938-RA	seryl-trna mitochondrial	up	4.31411	0.00899359	0.000700409	6	C:cytoplasm; F:aminoacyl-tRNA ligase activity; F:ATP binding; P:tRNA aminoacylation for protein translation; C:nucleus; F:zinc ion binding
CUST_4039_PI424980000	AAEL002283-RA	hypothetical protein AaeL_AAEL002283 [Aedes aegypti]	up	4.05666	0.00391757	0.000107126	0	-
CUST_13459_PI424980000	AAEL006147-RA	brain chitinase and chia	up	3.96349	0.00142838	1.11096e-05	3	F:chitinase activity; P:cuticle chitin catabolic process; F:cation binding
CUST_6962_PI424980000	AAEL004999-RA	hypothetical protein AaeL_AAEL004999 [Aedes aegypti]	up	3.84353	0.00355993	8.52767e-05	0	-
CUST_4858_PI424980000	AAEL012461-RA	monocarboxylate transporter	up	3.81993	0.00418589	0.000125447	1	P:transmembrane transport
CUST_13336_PI424980000	AAEL005986-RA	hypothetical protein AaeL_AAEL005986 [Aedes aegypti]	up	3.81726	0.00136515	8.45767e-06	2	F:zinc ion binding; C:intracellular
CUST_2615_PI424980000	AAEL005443-RA	slow termination of isoform b	up	3.79366	0.00730449	0.000455246	2	P:deactivation of rhodopsin mediated signaling; P:intracellular signaling pathway
CUST_3471_PI424980000	AAEL005937-RA	atp-binding cassette transporter	up	3.52756	0.000984846	3.78022e-06	7	P:auxin biosynthetic process; F:ATPase activity, coupled to transmembrane movement of substances; F:chloride channel activity; P:transmembrane transport; F:ATP binding; P:ion transport; C:integral to membrane
CUST_5807_PI424980000	AAEL006254-RA	beta- -glucuronyltransferase p	up	3.51185	0.00899359	0.000697753	7	F:galactosylgalactosylxylosylprotein 3-beta-glucuronosyltransferase activity; F:galactosyl beta-1,3 N-acetylgalactosamine beta-1,3-glucuronosyltransferase activity; P:glycosphingolipid biosynthetic process; F:N-acetyllactosamine beta-1,3-glucuronosyltransferase activity; P:proteoglycan biosynthetic process; F:asioloorosomucoid beta-1,3-glucuronosyltransferase activity; C:membrane
CUST_12832_PI424980000	AAEL007877-RA	coiled-coil domain containing 94	up	3.39778	0.00735068	0.000466285	0	-
CUST_937_PI424980000	AAEL000028-RA	serine protease 14	up	3.39702	0.00902617	0.000716094	2	F:serine-type endopeptidase activity; P:proteolysis
CUST_5348_PI424980000	AAEL012296-RA	cytochrome c oxidase assembly protein cox19	up	3.39098	0.00418146	0.000123754	2	F:molecular_function; C:cellular_component
CUST_2678_PI424980000	AAEL010973-RA	hypothetical protein AaeL_AAEL010973 [Aedes aegypti]	up	3.37977	0.00553917	0.000259201	0	-
CUST_4506_PI424980000	AAEL007864-RA	zinc finger protein	up	3.35138	0.00142838	1.09697e-05	4	P:cellular process; F:zinc ion binding; F:nucleic acid binding; C:nucleus
CUST_3510_PI424980000	AAEL003870-RA	tumor suppressor candidate 4	up	3.30875	0.00799055	0.000548039	3	P:dendrite morphogenesis; P:proline transport; F:channel regulator activity
CUST_70_PI424980000	AAEL002046-RA	cytochrome p450 CYP6CB1	up	3.27065	0.00489307	0.000181865	4	F:heme binding; P:oxidation reduction; F:monooxygenase activity; F:electron carrier activity
CUST_1719_PI424980000	AAEL000153-RA	domon domain-containing protein cg14681-like	up	3.15749	0.00589371	0.000299448	3	P:catecholamine metabolic process; P:histidine catabolic process; F:dopamine beta-monooxygenase activity
CUST_6305_PI424980000	AAEL012536-RA	hypothetical protein AaeL_AAEL012536 [Aedes aegypti]	up	3.15259	0.00178487	1.51443e-05	1	F:catalytic activity
CUST_2242_PI424980000	AAEL003455-RA	isoform a	up	3.13624	0.00718284	0.000440402	1	F:nucleic acid binding
CUST_158_PI424980000	AAEL002633-RA	cytochrome p450 CYP9J31	up	3.12994	0.00518488	0.000224577	4	F:heme binding; P:oxidation reduction; F:monooxygenase activity; F:electron carrier activity
CUST_7975_PI424980000	AAEL008101-RA	hypothetical protein AaeL_AAEL008101 [Aedes aegypti]	up	3.12404	0.00377173	9.75315e-05	2	F:zinc ion binding; F:nucleic acid binding
CUST_4_PI424980000	AAEL002031-RA	cytochrome p450 CYP12F7	up	3.10888	0.0023731	3.47959e-05	4	F:heme binding; P:oxidation reduction; F:monooxygenase activity; F:electron carrier activity
CUST_8489_PI424980000	AAEL005025-RA	u1 small nuclear	up	3.10304	0.00322331	7.00011e-05	5	C:U1 snRNP; F:nucleic acid binding; F:protein binding; C:precatalytic spliceosome; P:nuclear mRNA splicing, via spliceosome
CUST_10649_PI424980000	AAEL003299-RA	gly-rich secreted peptide	up	3.03655	0.00136515	8.61931e-06	0	-
CUST_9598_PI424980000	AAEL010937-RA	ws beta-transducin repeats protein	up	3.0197	0.0031493	6.38161e-05	3	F:molecular_function; P:biological_process; C:cellular_component
CUST_108_PI424980000	AAEL002638-RA	cytochrome p450 CYP9J6	up	2.99362	0.00224445	2.8813e-05	4	F:heme binding; P:oxidation reduction; F:monooxygenase activity; F:electron carrier activity
CUST_10313_PI424980000	AAEL003722-RA	ribonuclease	up	2.94827	0.00730449	0.000453814	1	P:protein folding
CUST_10596_PI424980000	AAEL001587-RA	zinc finger protein 95	up	2.94143	0.00355993	8.55928e-05	3	F:zinc ion binding; F:nucleic acid binding; C:nucleus
CUST_10304_PI424980000	AAEL014650-RA	mannose-binding protein-associated serine protease	up	2.93676	0.0039979	0.000110245	2	F:serine-type endopeptidase activity; P:proteolysis
CUST_87_PI424980000	AAEL009121-RA	cytochrome p450 CYP6N9	up	2.89228	0.00329212	7.24932e-05	4	F:heme binding; P:oxidation reduction; F:monooxygenase activity; F:electron carrier activity
CUST_12059_PI424980000	AAEL009158-RA	protein disulfide isomerase	up	2.88688	0.00501112	0.000203482	1	P:cell redox homeostasis
CUST_4544_PI424980000	AAEL013730-RA	isoform a	up	2.87515	0.00992848	0.000870709	0	-
CUST_6949_PI424980000	AAEL012953-RA	serine protease hepsin	up	2.86955	0.00504231	0.000205258	2	P:proteolysis; F:serine-type endopeptidase activity
CUST_13315_PI424980000	AAEL004942-RB	isoform d	up	2.85037	0.00272506	4.84455e-05	15	F:DNA-dependent ATPase activity; P:chromatin-mediated maintenance of transcription; P:axonogenesis; P:dendrite morphogenesis; F:general RNA polymerase II transcription factor activity; P:muscle organ development; P:phagocytosis, engulfment; F:helicase activity; F:transcription coactivator activity; F:DNA binding; P:imaginal disc-derived wing vein specification; P:oogenesis; P:hemocyte proliferati…
CUST_1802_PI424980000	AAEL003382-RA	ro ribonucleoprotein	up	2.80162	0.000779352	2.62949e-06	2	C:ribonucleoprotein complex; F:RNA binding
CUST_10840_PI424980000	AAEL013805-RA	isoform c	up	2.78617	0.00256256	4.43525e-05	4	C:integral to membrane; P:transmembrane transport; P:transport; F:transporter activity
CUST_10314_PI424980000	AAEL003722-RB	ribonuclease	up	2.77785	0.00359762	8.93954e-05	1	P:protein folding
CUST_104_PI424980000	AAEL014615-RA	cytochrome p450 CYP9J23	up	2.76915	0.000420971	2.88027e-07	4	F:heme binding; P:oxidation reduction; F:monooxygenase activity; F:electron carrier activity
CUST_11483_PI424980000	AAEL003342-RA	hypothetical protein AaeL_AAEL003342 [Aedes aegypti]	up	2.75727	0.00497418	0.000194566	0	-
CUST_8477_PI424980000	AAEL009634-RC	steroid dehydrogenase	up	2.74646	0.00224445	2.82262e-05	3	F:oxidoreductase activity; P:oxidation reduction; F:binding
CUST_10887_PI424980000	AAEL000073-RA	odorant-binding protein	up	2.72993	0.00496221	0.000193343	2	F:odorant binding; P:transport
CUST_9644_PI424980000	AAEL010732-RA	pre-mrna-splicing factor atp-dependent rna helicase prp22	up	2.71136	0.00248962	4.08651e-05	7	P:auxin biosynthetic process; F:ATP-dependent RNA helicase activity; F:nucleic acid binding; C:precatalytic spliceosome; F:ATP binding; P:nuclear mRNA splicing, via spliceosome; C:catalytic step 2 spliceosome
CUST_13233_PI424980000	AAEL008135-RA	cog3_aedae ame: full=conserved oligomeric golgi complex subunit 3 short=cog complex subunit 3 ame: full=component of oligomeric golgi complex 3	up	2.71044	0.00784408	0.000529133	8	C:Golgi membrane; P:dsRNA transport; P:intra-Golgi vesicle-mediated transport; F:protein transporter activity; P:intracellular protein transport; C:cis-Golgi network; P:ER to Golgi vesicle-mediated transport; C:Golgi transport complex
CUST_8426_PI424980000	AAEL006920-RA	membrane glycoprotein lig-1	up	2.69618	0.00992848	0.000881892	2	F:protein binding; F:peptidase activity
CUST_8478_PI424980000	AAEL009634-RD	steroid dehydrogenase	up	2.68258	0.000639363	1.35622e-06	3	F:oxidoreductase activity; P:oxidation reduction; F:binding
CUST_4889_PI424980000	AAEL008089-RA	isoform c	up	2.67701	0.00401321	0.000111668	4	C:integral to membrane; P:transmembrane transport; P:transport; F:transporter activity
CUST_11346_PI424980000	AAEL007888-RA	isoform a	up	2.66454	0.00902617	0.000718383	19	C:extrinsic to membrane; F:neuropeptide hormone activity; P:regulation of tube size, open tracheal system; C:fusome; C:cytoskeleton; P:establishment or maintenance of cell polarity; P:salivary gland morphogenesis; P:dorsal closure; C:septate junction; P:cytoskeleton organization; P:septate junction assembly; C:spectrosome; P:protein targeting to membrane; F:actin binding; P:maintenance of imagina…
CUST_76_PI424980000	AAEL009127-RA	cytochrome p450 CYP6M11	up	2.65449	0.000746909	1.81458e-06	4	F:heme binding; P:oxidation reduction; F:monooxygenase activity; F:electron carrier activity
CUST_8481_PI424980000	AAEL009634-RG	steroid dehydrogenase	up	2.65269	0.0023731	3.2974e-05	3	F:oxidoreductase activity; P:oxidation reduction; F:binding
CUST_5666_PI424980000	AAEL002139-RA	coiled-coil domain-containing protein 95	up	2.60861	0.00102013	4.14777e-06	0	-
CUST_8551_PI424980000	AAEL008901-RA	fast kinase domain-containing protein 3-like	up	2.58883	0.00383605	0.000101132	3	P:apoptosis; F:ATP binding; F:protein kinase activity
CUST_146_PI424980000	AAEL014608-RA	cytochrome p450	up	2.56462	0.00734532	0.000465198	4	F:heme binding; P:oxidation reduction; F:monooxygenase activity; F:electron carrier activity
CUST_6358_PI424980000	AAEL006185-RA	exocyst componenet sec8	up	2.56025	0.00189877	1.74792e-05	3	C:exocyst; P:protein transport; P:vesicle docking during exocytosis
CUST_3834_PI424980000	AAEL003652-RA	proprotein convertase subtilisin kexin type furin	up	2.53361	0.00292083	5.372e-05	5	F:serine-type endopeptidase activity; C:Golgi stack; C:plasma membrane; P:proteolysis; C:integral to Golgi membrane
CUST_109_PI424980000	AAEL006811-RA	cytochrome p450 CYP9J8	up	2.48555	0.00675157	0.000383249	4	F:heme binding; P:oxidation reduction; F:monooxygenase activity; F:electron carrier activity
CUST_12719_PI424980000	AAEL011302-RA	annexin	up	2.44039	0.00248962	4.12421e-05	4	F:actin binding; F:calcium-dependent phospholipid binding; F:calcium ion binding; P:wing disc dorsal/ventral pattern formation
CUST_338_PI424980000	AAEL008624-RA	abc transporter	up	2.43414	0.00188138	1.65333e-05	4	P:auxin biosynthetic process; F:ATPase activity; F:ATP binding; C:integral to membrane
CUST_7026_PI424980000	AAEL011597-RB	pyridoxal phosphate phosphatase phospho2	up	2.36786	0.00510068	0.000215954	2	P:metabolic process; F:phosphatase activity
CUST_9172_PI424980000	AAEL010602-RA	starch branching enzyme ii	up	2.33947	0.00691604	0.000416053	3	P:carbohydrate metabolic process; F:hydrolase activity, hydrolyzing O-glycosyl compounds; F:cation binding
CUST_4382_PI424980000	AAEL014811-RA	mesenchymal stem cell protein dscd75	up	2.33474	0.00585977	0.00029472	2	F:molecular_function; C:cellular_component
CUST_103_PI424980000	AAEL006802-RA	cytochrome p450 CYP9J22	up	2.30292	0.00142838	1.07964e-05	4	F:heme binding; P:oxidation reduction; F:monooxygenase activity; F:electron carrier activity
CUST_4201_PI424980000	AAEL015631-RA	asparagine synthetase	up	2.29194	0.00233665	3.09193e-05	2	F:asparagine synthase (glutamine-hydrolyzing) activity; P:asparagine biosynthetic process
CUST_79_PI424980000	AAEL017297-RA	cytochrome p450 CYP6M9	up	2.28999	0.00408468	0.000117177	4	F:heme binding; P:oxidation reduction; F:monooxygenase activity; F:electron carrier activity
CUST_77_PI424980000	AAEL009117-RA	cytochrome p450 CYP6M5	up	2.28591	0.00518488	0.000222522	4	F:heme binding; P:oxidation reduction; F:monooxygenase activity; F:electron carrier activity
CUST_1936_PI424980000	AAEL007512-RA	atp-dependent rna and dna helicase	up	2.27096	0.00379785	9.89742e-05	6	F:DNA binding; P:DNA duplex unwinding; C:mitochondrial matrix; F:DNA helicase activity; F:ATP binding; C:nucleus
CUST_3383_PI424980000	AAEL015236-RA	signal recognition 9kd-	up	2.2588	0.0084875	0.000612986	6	F:mRNA binding; C:signal recognition particle; P:negative regulation of translational elongation; F:7S RNA binding; F:protein binding; P:SRP-dependent cotranslational protein targeting to membrane
CUST_2343_PI424980000	AAEL012867-RA	retinol-binding protein	up	2.25626	0.00852298	0.000618992	1	F:transferase activity
CUST_12722_PI424980000	AAEL011302-RD	annexin	up	2.22947	0.000581983	1.11694e-06	4	F:actin binding; F:calcium-dependent phospholipid binding; F:calcium ion binding; P:wing disc dorsal/ventral pattern formation
CUST_12226_PI424980000	AAEL008367-RA	fk506-binding protein 2	up	2.21695	0.00489307	0.000180291	5	C:endoplasmic reticulum membrane; P:protein folding; F:FK506 binding; F:protein binding; F:peptidyl-prolyl cis-trans isomerase activity
CUST_3204_PI424980000	AAEL004642-RA	wd-repeat protein	up	2.20444	0.00433446	0.000136418	3	P:regulation of transcription; F:transcription regulator activity; C:nucleus
CUST_7330_PI424980000	AAEL009291-RA	retinoid-inducible serine carboxypeptidase (serine carboxypeptidase	up	2.19779	0.00433446	0.000136829	2	F:serine-type carboxypeptidase activity; P:proteolysis
CUST_8153_PI424980000	AAEL009878-RA	vir_drops ame: full=protein virilizer	up	2.16251	0.00547437	0.00025018	5	P:RNA splicing, via transesterification reactions; P:regulation of gene expression; P:border follicle cell migration; P:mRNA processing; C:nucleus
CUST_93_PI424980000	AAEL009131-RA	cytochrome p450 CYP6Z8	up	2.14527	0.00510041	0.000213805	4	F:heme binding; P:oxidation reduction; F:monooxygenase activity; F:electron carrier activity
CUST_4714_PI424980000	AAEL011472-RA	hypothetical protein AaeL_AAEL011472 [Aedes aegypti]	up	2.14394	0.00386534	0.000102685	0	-
CUST_13444_PI424980000	AAEL003281-RA	adp-ribosylation factor-like 2	up	2.1365	0.0019014	1.78617e-05	15	C:microtubule organizing center; C:cytosol; P:acetylcholine transport; F:GTPase inhibitor activity; P:cell cycle; P:small GTPase mediated signal transduction; P:protein amino acid ADP-ribosylation; P:neurotransmitter secretion; F:protein binding; P:tubulin complex assembly; F:GTPase activity; P:endosome transport; P:synaptic vesicle endocytosis; C:Golgi apparatus; F:GTP binding
CUST_2264_PI424980000	AAEL002665-RA	matrix metalloproteinase	up	2.11522	0.000420971	4.89487e-07	4	F:metalloendopeptidase activity; P:proteolysis; C:extracellular matrix; F:zinc ion binding
CUST_11721_PI424980000	AAEL002801-RA	glutathione s-transferase	up	2.09903	0.00461721	0.000154373	3	F:nucleic acid binding; C:nucleus; F:zinc ion binding
CUST_10145_PI424980000	AAEL009440-RA	isoform a	up	2.09499	0.00998506	0.000891596	2	F:molecular_function; P:biological_process
CUST_12290_PI424980000	AAEL009080-RA	af132299_1 d-importin 7 7	up	2.09325	0.00910212	0.00072725	24	C:nuclear chromatin; P:rhabdomere development; P:female meiosis chromosome segregation; C:nuclear pore; P:imaginal disc-derived wing vein specification; C:X chromosome located dosage compensation complex, transcription activating; P:negative regulation of neuron apoptosis; P:histone phosphorylation; F:Ran GTPase binding; F:histone kinase activity (H3-S10 specific); C:perinuclear region of cytopla…
CUST_3069_PI424980000	AAEL014507-RA	peptide-n -(n-acetyl-beta-glucosaminyl)asparagine amidase	up	2.09091	0.00423618	0.000128369	6	C:cytoplasm; F:protein binding; P:glycoprotein catabolic process; F:damaged DNA binding; P:nucleotide-excision repair; C:nucleus
CUST_957_PI424980000	AAEL002610-RA	serine protease	up	2.08718	0.00738221	0.000472014	2	F:serine-type endopeptidase activity; P:proteolysis
CUST_11833_PI424980000	AAEL014612-RA	cytochrome p450	up	2.08451	0.00992848	0.000864536	4	F:heme binding; P:oxidation reduction; F:monooxygenase activity; F:electron carrier activity
CUST_6516_PI424980000	AAEL012486-RA	juvenile hormone-inducible	up	2.07772	0.00853838	0.00062356	0	-
CUST_648_PI424980000	AAEL002898-RA	pterin-4a-carbinolamine dehydratase	up	2.07096	0.00224445	2.61774e-05	2	F:4-alpha-hydroxytetrahydrobiopterin dehydratase activity; P:tetrahydrobiopterin biosynthetic process
CUST_9471_PI424980000	AAEL011126-RA	alcohol dehydrogenase	up	2.06797	0.00861666	0.000642663	3	F:zinc ion binding; P:oxidation reduction; F:L-iditol 2-dehydrogenase activity
CUST_2859_PI424980000	AAEL006209-RA	exo1_drome ame: full=exonuclease 1 ame: full=exonuclease i ame: full=protein tosca	up	2.0664	0.00489256	0.000177417	3	P:DNA repair; F:DNA binding; F:exonuclease activity
CUST_12297_PI424980000	AAEL009445-RA	hypothetical protein AaeL_AAEL009445 [Aedes aegypti]	up	2.05481	0.00489307	0.000180282	0	-
CUST_13902_PI424980000	AAEL007349-RA	membrane-associated lps-inducible tnf alpha factor protein	up	2.04695	0.00975418	0.000824736	1	F:zinc ion binding
CUST_11_PI424980003	AAEL002380-RA	gustatory receptor 22	up	2.0116	0.00736996	0.000470486	13	C:dendrite; F:olfactory receptor activity; P:response to carbon dioxide; C:plasma membrane; P:sensory perception of taste; P:signal transduction; P:detection of carbon dioxide; P:G-protein coupled receptor protein signaling pathway; C:integral to membrane; P:sensory perception of smell; C:neuronal cell body; P:behavior; F:taste receptor activity
CUST_1150_PI424980000	AAEL009206-RA	organic cation transporter	down	2.0023	0.00292083	5.43157e-05	3	P:transmembrane transport; C:integral to membrane; F:transporter activity
CUST_3642_PI424980000	AAEL004469-RA	alpha gamma epsilon	down	2.01212	0.00446785	0.000143745	8	F:protein transporter activity; P:synaptic vesicle coating; C:synaptic vesicle; P:neurotransmitter secretion; C:AP-2 adaptor complex; F:protein binding; P:asymmetric cell division; P:intracellular protein transport
CUST_9452_PI424980000	AAEL013054-RA	zinc finger protein 58	down	2.01978	0.00799835	0.000551686	3	F:nucleic acid binding; C:nucleus; F:zinc ion binding
CUST_639_PI424980000	AAEL003216-RA	cuticular protein 49ah	down	2.02087	0.00973998	0.000822487	1	F:structural constituent of cuticle
CUST_12621_PI424980000	AAEL011470-RA	#NAME?	down	2.02593	0.0019905	1.9905e-05	1	P:transmembrane transport
CUST_386_PI424980000	AAEL008490-RA	nadh dehydrogenase 1 beta 7	down	2.02803	0.00604658	0.000310269	4	P:mitochondrial electron transport, NADH to ubiquinone; F:NADH dehydrogenase (ubiquinone) activity; F:zinc ion binding; C:mitochondrion
CUST_12505_PI424980000	AAEL000841-RA	hypothetical protein AaeL_AAEL000841 [Aedes aegypti]	down	2.03282	0.00553033	0.000257523	0	-
CUST_7478_PI424980000	AAEL005997-RA	---NA---	down	2.0459	0.00250866	4.20645e-05	0	-
CUST_6211_PI424980000	AAEL007755-RA	f-box domain protein	down	2.06082	0.00510068	0.000216307	0	-
CUST_13165_PI424980000	AAEL008195-RA	uncharacterized protein cg1161	down	2.08725	0.00790429	0.000538925	1	C:integral to membrane
CUST_11_PI424980000	AAEL014413-RA	cytochrome p450	down	2.08844	0.00902617	0.000705157	4	F:heme binding; P:oxidation reduction; F:monooxygenase activity; F:electron carrier activity
CUST_13306_PI424980000	AAEL010313-RA	sex peptide receptor	down	2.08944	0.00889741	0.000686592	6	P:negative regulation of female receptivity, post-mating; P:regulation of post-mating oviposition; F:neuropeptide receptor activity; C:plasma membrane; P:G-protein coupled receptor protein signaling pathway; C:integral to membrane
CUST_6117_PI424980000	AAEL000465-RA	isoform b	down	2.13112	0.00197184	1.95192e-05	1	F:oxidoreductase activity
CUST_8932_PI424980000	AAEL003130-RA	bcr-associated bap	down	2.13324	0.00631283	0.000332858	3	C:integral to membrane; C:endoplasmic reticulum; P:intracellular protein transport
CUST_3607_PI424980000	AAEL011119-RA	hypothetical protein AaeL_AAEL011119 [Aedes aegypti]	down	2.14095	0.00695218	0.000423224	0	-
CUST_1396_PI424980000	AAEL008418-RB	pyrroline-5-carboxylate reductase	down	2.1451	0.00644425	0.000350203	4	F:binding; F:pyrroline-5-carboxylate reductase activity; P:oxidation reduction; P:proline biosynthetic process
CUST_3576_PI424980000	AAEL011120-RA	hypothetical protein AaeL_AAEL011120 [Aedes aegypti]	down	2.1478	0.00889741	0.000686924	0	-
CUST_3443_PI424980000	AAEL005779-RA	cral trio domain-containing protein	down	2.15565	0.00355993	8.66202e-05	3	C:intracellular; P:transport; F:transporter activity
CUST_482_PI424980000	AAEL000006-RA	phosphoenolpyruvate carboxykinase	down	2.16662	0.00680862	0.000393358	5	P:gluconeogenesis; F:GTP binding; F:kinase activity; F:phosphoenolpyruvate carboxykinase (GTP) activity; C:mitochondrion
CUST_7956_PI424980000	AAEL002320-RA	hypothetical protein AaeL_AAEL002320 [Aedes aegypti]	down	2.16812	0.00248962	4.03573e-05	2	F:zinc ion binding; C:nucleus
CUST_1154_PI424980000	AAEL014889-RA	nadh:ubiquinone dehydrogenase	down	2.17262	0.00853292	0.000620576	2	P:mitochondrial electron transport, NADH to ubiquinone; F:NADH dehydrogenase (ubiquinone) activity
CUST_8933_PI424980000	AAEL003130-RB	bcr-associated bap	down	2.19289	0.00509563	0.000212071	3	C:integral to membrane; C:endoplasmic reticulum; P:intracellular protein transport
CUST_5816_PI424980000	AAEL012387-RA	polyadenylation factor	down	2.19291	0.000996552	3.92581e-06	0	-
CUST_8934_PI424980000	AAEL003130-RC	bcr-associated bap	down	2.19407	0.00685787	0.000405238	3	C:integral to membrane; C:endoplasmic reticulum; P:intracellular protein transport
CUST_1395_PI424980000	AAEL008418-RA	pyrroline-5-carboxylate reductase	down	2.19673	0.00319568	6.62917e-05	4	F:binding; F:pyrroline-5-carboxylate reductase activity; P:oxidation reduction; P:proline biosynthetic process
CUST_9248_PI424980000	AAEL001175-RA	dna photolyase	down	2.24323	0.0023731	3.24301e-05	2	P:DNA repair; F:DNA (6-4) photolyase activity
CUST_4431_PI424980000	AAEL007607-RA	transmembrane protein 135	down	2.24492	0.00369669	9.48443e-05	0	-
CUST_5514_PI424980000	AAEL009031-RA	forkhead box protein	down	2.24513	0.00833153	0.00058994	5	F:RNA polymerase II transcription factor activity, enhancer binding; P:salivary gland morphogenesis; P:mesodermal cell fate commitment; C:nucleus; P:regulation of gene-specific transcription from RNA polymerase II promoter
CUST_8423_PI424980000	AAEL014554-RA	zinc finger protein 506	down	2.24718	0.00464344	0.000159941	3	F:nucleic acid binding; C:nucleus; F:zinc ion binding
CUST_12766_PI424980000	AAEL001401-RA	membrane glycoprotein lig-1	down	2.25584	0.00256256	4.45212e-05	1	F:protein binding
CUST_4632_PI424980000	AAEL013549-RA	zinc finger protein 33a	down	2.25726	0.000779352	2.60855e-06	2	C:nucleus; F:zinc ion binding
CUST_13854_PI424980000	AAEL014523-RA	neuroendocrine convertase	down	2.26028	0.00831454	0.000586217	5	F:serine-type endopeptidase activity; P:peptide hormone processing; P:instar larval or pupal development; C:extracellular region; P:hatching behavior
CUST_9801_PI424980000	AAEL003148-RA	short-chain dehydrogenase	down	2.2662	0.00658456	0.000367804	3	F:oxidoreductase activity; P:oxidation reduction; F:binding
CUST_2920_PI424980000	AAEL015571-RA	hypothetical protein AaeL_AAEL015571 [Aedes aegypti]	down	2.2732	0.00736655	0.000469106	0	-
CUST_9972_PI424980000	AAEL003347-RC	cral trio domain-containing protein	down	2.27666	0.00803468	0.000559993	4	C:intracellular; P:transport; F:retinal binding; F:transporter activity
CUST_13579_PI424980000	AAEL003926-RA	gtp-binding protein lepa	down	2.28015	0.00142838	1.05571e-05	3	P:translation; F:GTPase activity; F:GTP binding
CUST_8641_PI424980000	AAEL000722-RA	coiled-coil-helix-coiled-coil-helix domain-containing protein 7	down	2.28106	0.0023731	3.42279e-05	2	F:cytochrome-c oxidase activity; C:mitochondrion
CUST_2810_PI424980000	AAEL003854-RA	hypothetical protein AaeL_AAEL003854 [Aedes aegypti]	down	2.28673	0.00219795	2.44217e-05	0	-
CUST_9971_PI424980000	AAEL003347-RB	cral trio domain-containing protein	down	2.29074	0.00889741	0.000684966	4	C:intracellular; P:transport; F:retinal binding; F:transporter activity
CUST_9396_PI424980000	AAEL007545-RA	hypothetical protein AaeL_AAEL007545 [Aedes aegypti]	down	2.30465	0.00682693	0.000396514	1	F:DNA binding
CUST_9460_PI424980000	AAEL000241-RA	pci domain-containing protein 2	down	2.31117	0.00138406	9.50669e-06	3	C:cytoplasm; F:calcium-independent phospholipase A2 activity; C:polysome
CUST_4334_PI424980000	AAEL008960-RA	regulator of telomere elongation helicase 1 rtel1	down	2.32264	0.000420971	3.69562e-07	7	F:iron-sulfur cluster binding; F:ATP-dependent DNA helicase activity; F:metal ion binding; F:DNA binding; F:ATP binding; P:regulation of double-strand break repair via homologous recombination; C:nucleus
CUST_9970_PI424980000	AAEL003347-RA	cral trio domain-containing protein	down	2.33349	0.00975418	0.000825896	4	C:intracellular; P:transport; F:retinal binding; F:transporter activity
CUST_2738_PI424980000	AAEL012318-RA	2-amino-3-ketobutyrate coenzyme a ligase	down	2.34114	0.00784408	0.000529721	7	F:ligase activity; F:pyridoxal phosphate binding; P:biosynthetic process; F:transferase activity, transferring nitrogenous groups; P:cellular amino acid metabolic process; F:glycine C-acetyltransferase activity; C:mitochondrion
CUST_3814_PI424980000	AAEL010016-RA	hypothetical protein AaeL_AAEL010016 [Aedes aegypti]	down	2.34539	0.00635073	0.00033614	0	-
CUST_1092_PI424980000	AAEL007357-RA	comm domain-containing protein 2	down	2.34541	0.00786006	0.000533531	0	-
CUST_5953_PI424980000	AAEL015386-RA	dipeptidyl peptidase 4	down	2.40263	0.00802725	0.000558589	3	C:membrane; P:proteolysis; F:dipeptidyl-peptidase activity
CUST_8960_PI424980000	AAEL014701-RA	ssxt protein	down	2.44956	0.0061566	0.000319024	0	-
CUST_5775_PI424980000	AAEL003212-RA	protease m1 zinc metalloprotease	down	2.44963	0.00795507	0.000544802	4	F:metallopeptidase activity; P:proteolysis; F:zinc ion binding; F:aminopeptidase activity
CUST_579_PI424980000	AAEL011187-RA	pre-mrna-splicing helicase brr2	down	2.47271	0.00918185	0.000739185	8	P:auxin biosynthetic process; F:ATP-dependent RNA helicase activity; F:nucleic acid binding; C:precatalytic spliceosome; P:regulation of alternative nuclear mRNA splicing, via spliceosome; F:ATP binding; C:U5 snRNP; C:catalytic step 2 spliceosome
CUST_5934_PI424980000	AAEL007910-RA	dhfr-coamplified protein	down	2.47623	0.00219795	2.42823e-05	0	-
CUST_3611_PI424980000	AAEL000912-RA	isoform b	down	2.47876	0.00730134	0.000451356	3	F:catalytic activity; P:metabolic process; F:binding
CUST_4098_PI424980000	AAEL007365-RA	reverse ribonuclease integrase	down	2.48777	0.00464693	0.00016053	1	F:nucleic acid binding
CUST_13762_PI424980000	AAEL012506-RA	hypothetical protein AaeL_AAEL012506 [Aedes aegypti]	down	2.54776	0.00936597	0.000771037	0	-
CUST_214_PI424980000	AAEL012509-RA	esterase fe4	down	2.56191	0.00784408	0.000527612	1	F:hydrolase activity
CUST_10780_PI424980000	AAEL011560-RA	exonuclease 3 -5 domain-containing protein 1	down	2.60341	0.00656768	0.000362598	4	F:nucleic acid binding; P:nucleobase, nucleoside, nucleotide and nucleic acid metabolic process; F:3'-5' exonuclease activity; C:intracellular
CUST_13031_PI424980000	AAEL009582-RA	hypothetical protein AaeL_AAEL009582 [Aedes aegypti]	down	2.61863	0.00730449	0.000453775	0	-
CUST_2688_PI424980000	AAEL012596-RA	sodium chloride dependent transporter	down	2.65102	0.00433446	0.000134217	3	C:integral to plasma membrane; F:neurotransmitter:sodium symporter activity; P:neurotransmitter transport
CUST_148_PI424980000	AAEL014891-RA	cytochrome p450	down	2.66987	0.00521411	0.000228578	4	F:heme binding; P:oxidation reduction; F:monooxygenase activity; F:electron carrier activity
CUST_7560_PI424980000	AAEL002331-RA	mannose-6-phosphate isomerase	down	2.67919	0.00489307	0.000178594	3	F:zinc ion binding; F:mannose-6-phosphate isomerase activity; P:carbohydrate metabolic process
CUST_8827_PI424980000	AAEL010891-RA	tm2 domain-containing protein cg11103	down	2.70452	0.00749503	0.000484527	0	-
CUST_11682_PI424980000	AAEL003090-RA	malate synthase	down	2.72737	0.0023731	3.46778e-05	3	P:tricarboxylic acid cycle; F:malate synthase activity; P:glyoxylate cycle
CUST_9488_PI424980000	AAEL015440-RA	hypothetical protein AaeL_AAEL015440 [Aedes aegypti]	down	2.73484	0.00675157	0.000385317	0	-
CUST_7518_PI424980000	AAEL011514-RA	mitochondrial cytochrome c oxidase subunit 7c	down	2.74427	0.00464159	0.00015847	7	F:cytochrome-c oxidase activity; F:zinc ion binding; C:mitochondrial respiratory chain complex IV; P:regulation of transcription, DNA-dependent; F:DNA binding; P:mitochondrial electron transport, cytochrome c to oxygen; C:nucleus
CUST_11415_PI424980000	AAEL011275-RA	organic cation	down	2.77787	0.00241657	3.71523e-05	3	P:transmembrane transport; C:integral to membrane; F:transporter activity
CUST_1728_PI424980000	AAEL000563-RA	galactose-specific c-type	down	2.85005	0.00496221	0.000191896	1	F:sugar binding
CUST_7524_PI424980000	AAEL012567-RA	synaptic vesicle protein	down	2.89258	0.00782691	0.000522113	1	P:transmembrane transport
CUST_4145_PI424980000	AAEL007541-RA	dna polymerase delta small subunit	down	2.92248	0.00784408	0.000528186	5	F:DNA-directed DNA polymerase activity; P:DNA replication; P:mitotic spindle organization; F:DNA binding; P:response to DNA damage stimulus
CUST_4146_PI424980000	AAEL007541-RB	dna polymerase delta small subunit	down	2.97616	0.00680023	0.000390842	6	F:DNA-directed DNA polymerase activity; C:delta DNA polymerase complex; P:DNA replication; P:mitotic spindle organization; F:DNA binding; P:response to DNA damage stimulus
CUST_6463_PI424980000	AAEL007243-RA	abhydrolase domain containing 11	down	3.02419	0.000779352	2.75528e-06	2	F:hydrolase activity; C:mitochondrion
CUST_2460_PI424980000	AAEL010540-RA	maltase 1	down	3.03956	0.00355993	8.69597e-05	3	F:hydrolase activity; P:carbohydrate metabolic process; F:cation binding
CUST_9308_PI424980000	AAEL013844-RA	diazepam binding	down	3.04405	0.00635096	0.000338711	2	P:cellular acyl-CoA homeostasis; F:acyl-CoA binding
CUST_7981_PI424980000	AAEL004350-RA	janus a	down	3.04935	0.00326291	7.15203e-05	2	P:sex differentiation; P:cell differentiation
CUST_11147_PI424980000	AAEL007501-RA	nikkomycin biosynthesis protein	down	3.07829	0.00466029	0.000161463	4	P:oxidation reduction; F:L-ascorbic acid binding; F:iron ion binding; F:oxidoreductase activity, acting on paired donors, with incorporation or reduction of molecular oxygen, 2-oxoglutarate as one donor, and incorporation of one atom each of oxygen into both donors
CUST_8595_PI424980000	AAEL015438-RA	mannose-6-phosphate isomerase	down	3.14946	0.00579225	0.000278496	3	F:zinc ion binding; F:mannose-6-phosphate isomerase activity; P:carbohydrate metabolic process
CUST_2150_PI424980000	AAEL015034-RA	alcohol dehydrogenase	down	3.19512	0.00142838	1.07421e-05	3	F:zinc ion binding; P:oxidation reduction; F:oxidoreductase activity
CUST_5845_PI424980000	AAEL001706-RA	p15-2b	down	3.22982	0.00547437	0.000250199	2	C:intracellular; P:transport
CUST_11230_PI424980000	AAEL014250-RA	cg9273	down	3.30622	0.000779352	2.74657e-06	6	P:DNA-dependent DNA replication; F:structural constituent of ribosome; C:lipid particle; C:DNA replication factor A complex; C:cytosolic large ribosomal subunit; P:translational elongation
CUST_1001_PI424980000	AAEL009192-RA	adhesive serine protease	down	3.31116	0.00789428	0.000536651	8	F:scavenger receptor activity; F:serine-type endopeptidase activity; P:long-term memory; F:chitin binding; C:extracellular region; P:proteolysis; C:membrane; P:chitin metabolic process
CUST_552_PI424980000	AAEL011906-RA	histone h1	down	3.33071	0.00740911	0.000474483	4	C:nucleosome; F:DNA binding; P:nucleosome assembly; C:nucleus
CUST_168_PI424980000	AAEL001078-RA	glutathione s transferase d1	down	3.34089	0.00520289	0.000226631	3	C:extracellular region; P:glutathione metabolic process; F:glutathione transferase activity
CUST_3124_PI424980000	AAEL004070-RA	isoform b	down	3.51494	0.00691604	0.000417058	2	F:binding; P:biological_process
CUST_11764_PI424980000	AAEL001186-RA	2-deoxyglucose-6-phosphate phosphatase	down	3.61271	0.00715724	0.00043811	4	F:nucleic acid binding; P:metabolic process; F:catalytic activity; F:zinc ion binding
CUST_1652_PI424980000	AAEL010784-RA	alpha-2-macroglobulin receptor-associated protein	down	3.73777	0.00585977	0.000290236	3	C:endoplasmic reticulum; F:heparin binding; F:low-density lipoprotein receptor binding
CUST_7403_PI424980000	AAEL010522-RA	domain-containing histone demethylation protein 3c	down	3.76451	0.00938273	0.000773365	7	F:histone demethylase activity (H3-K9 specific); F:DNA binding; F:histone demethylase activity (H3-K36 specific); C:nucleus; P:histone H3-K9 demethylation; P:histone H3-K36 demethylation; F:transcription repressor activity
CUST_844_PI424980000	AAEL012421-RA	cade_drome ame: full=de-cadherin ame: full=protein shotgun flags: precursor	down	3.90033	0.00456672	0.000151302	33	P:axon guidance; P:oocyte anterior/posterior axis specification; F:cell adhesion molecule binding; P:apical protein localization; P:maintenance of epithelial integrity, open tracheal system; P:calcium-dependent cell-cell adhesion; P:pole cell migration; P:gastrulation involving germ band extension; P:germarium-derived female germ-line cyst encapsulation; P:heart development; P:oocyte localization…
CUST_7342_PI424980000	AAEL005933-RA	isoform a	down	3.97338	0.00353053	8.23868e-05	0	-
CUST_12332_PI424980000	AAEL000847-RA	u587_drops ame: full=upf0587 protein ga18326	down	4.05211	0.00131508	7.43884e-06	3	F:molecular_function; P:biological_process; C:cellular_component
CUST_4974_PI424980000	AAEL002546-RA	isoform a	down	4.16081	0.00501112	0.000201521	5	P:ATP synthesis coupled proton transport; C:proton-transporting V-type ATPase, V1 domain; F:proton-transporting ATPase activity, rotational mechanism; F:hydrogen ion transporting ATP synthase activity, rotational mechanism; C:membrane
CUST_7156_PI424980000	AAEL001001-RA	hypothetical protein AaeL_AAEL001001 [Aedes aegypti]	down	4.29738	0.00224445	2.79023e-05	0	-
CUST_6086_PI424980000	AAEL012441-RA	hypothetical protein AaeL_AAEL012441 [Aedes aegypti]	down	4.3552	0.00138033	9.20221e-06	1	F:zinc ion binding
CUST_9042_PI424980000	AAEL004607-RA	molybdopterin biosynthesis moeb protein	down	5.22826	0.00542566	0.000243881	8	F:metal ion binding; F:thiosulfate sulfurtransferase activity; P:Mo-molybdopterin cofactor biosynthetic process; F:Mo-molybdopterin cofactor sulfurase activity; F:ATP binding; F:nucleotidyltransferase activity; C:cytosol; P:tRNA processing
CUST_10967_PI424980000	AAEL003227-RA	aminopeptidase n	down	5.3006	0.00355993	8.65369e-05	4	F:metallopeptidase activity; P:proteolysis; F:zinc ion binding; F:aminopeptidase activity
CUST_12397_PI424980000	AAEL010081-RA	gpi ethanolamine phosphate transferase 2-like	down	5.42658	0.00695218	0.000423451	2	F:catalytic activity; P:metabolic process
CUST_13146_PI424980000	AAEL003228-RA	mitotic protein phosphatase 1	down	5.47032	0.00969695	0.000810038	1	F:protein binding
CUST_4763_PI424980000	AAEL014040-RA	trna guanylyltransferase	down	5.82016	0.00353053	8.27356e-05	3	P:tRNA modification; F:nucleotidyltransferase activity; C:cytoplasm
CUST_13065_PI424980000	AAEL008534-RA	---NA---	down	7.06615	0.00585977	0.000288257	0	-
CUST_9573_PI424980000	AAEL010914-RA	tyrosine-protein phosphatase non-receptor type 23	down	9.62545	0.00470447	0.000166713	2	F:protein tyrosine phosphatase activity; P:protein amino acid dephosphorylation
CUST_13595_PI424980000	AAEL013004-RA	hypothetical protein AaeL_AAEL013004 [Aedes aegypti]	down	10.0311	0.00241657	3.74311e-05	0	-
CUST_11200_PI424980000	AAEL014671-RA	protease s51 alpha-aspartyl dipeptidase	down	12.8547	0.00429723	0.000131521	4	C:cytoplasm; P:proteolysis; F:dipeptidyl-peptidase activity; F:serine-type peptidase activity
CUST_11913_PI424980000	AAEL013113-RA	lacb2_drome ame: full=beta-lactamase-like protein 2 homolog	down	14.6807	0.000420971	2.87396e-07	1	F:hydrolase activity
CUST_6237_PI424980000	AAEL004539-RA	hypothetical protein AaeL_AAEL004539 [Aedes aegypti]	down	25.0991	0.00520289	0.000227561	0	-
